# Supplementary material for: Spatial clusters of Varroa destructor control strategies in Europe
Source: Springer Nature journal article supplement (doi:10.1007/s10340-022-01523-2), 2022-06-29
Supplement: MOESM1 [file 10340_2022_1523_MOESM1_ESM.pdf]

Supplementary information for the article:

Brodtschneider, R.; Schlagbauer, J.; Arakelyan, I.; Ballis, A.; Brus, J.; Brusbardis, V.; Cadahía, L.; Charrière, J.-D.; Chlebo, R.; Coffey, M. F.; Cornelissen, B.; da Costa, C. A.; Danneels, E.; Danihlík, J.; Dobrescu, C.; Evans, G.; Fedoriak, M.; Forsythe, I.; Gregorc, A.; Johannesen, J.; Kauko, L.; Kristiansen, P.; Martikkala, M.; Martín-Hernández, R.; Mazur, E.; Mutinelli, F.; Patalano, S.; Raudmets, A.; Simon Delso, N.; Stevanovic, J.; Uzunov, A.; Vejsnæs, F.; Williams, A.; Gray, A. Spatial Clusters of Varroa Destructor Control Strategies in Europe. *J Pest Sci* 2022. <https://doi.org/10.1007/s10340-022-01523-2>.

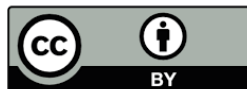

This work is licensed under a  
[Creative Commons Attribution 4.0 International \(CC BY 4.0\)](https://creativecommons.org/licenses/by/4.0/)

## Supplementary Information

### Spatial clusters of *Varroa destructor* control strategies in Europe. *Journal of Pest Science*, 2022.

Robert Brodschneider<sup>1</sup>, Johannes Schlagbauer, Iliyana Arakelyan, Alexis Ballis, Jan Brus, Valters Brusbardis, Luis Cadahía, Jean-Daniel Charrière, Robert Chlebo, Mary F. Coffey, Bram Cornelissen, Cristina Amaro da Costa, Ellen Danneels, Jiří Danihlík, Constantin Dobrescu, Garth Evans, Mariia Fedoriak, Ivan Forsythe, Aleš Gregorc, Jes Johannesen, Lassi Kauko, Preben Kristiansen, Maritta Martikkala, Raquel Martín-Hernández, Ewa Mazur, Franco Mutinelli, Solenn Patalano, Aivar Raudmets, Noa Simon Delso, Jevrosima Stevanovic, Aleksandar Uzunov, Flemming Vejsnæs, Anthony Williams, Alison Gray

<sup>1</sup> Institute of Biology, University of Graz, Graz, Austria. [robert.brodschneider@uni-graz.at](mailto:robert.brodschneider@uni-graz.at)

---

**Table S1. Utilized packages of the statistical software R version 4.0.4.**

| Name       | Reference                                                                                                                                                                                                                                                                     |
|------------|-------------------------------------------------------------------------------------------------------------------------------------------------------------------------------------------------------------------------------------------------------------------------------|
| tidyverse  | Wickham et al., (2019). Welcome to the tidyverse. <i>Journal of Open Source Software</i> , 4(43), 1686, <a href="https://doi.org/10.21105/joss.01686">https://doi.org/10.21105/joss.01686</a>                                                                                 |
| here       | Kirill Müller (2020). here: A Simpler Way to Find Your Files. R package version 1.0.1. <a href="https://CRAN.R-project.org/package=here">https://CRAN.R-project.org/package=here</a>                                                                                          |
| readxl     | Hadley Wickham and Jennifer Bryan (2019). readxl: Read Excel Files. R package version 1.3.1. <a href="https://CRAN.R-project.org/package=readxl">https://CRAN.R-project.org/package=readxl</a>                                                                                |
| gridExtra  | Baptiste Auguie (2017). gridExtra: Miscellaneous Functions for "Grid" Graphics. R package version 2.3. <a href="https://CRAN.R-project.org/package=gridExtra">https://CRAN.R-project.org/package=gridExtra</a>                                                                |
| factoextra | Alboukadel Kassambara and Fabian Mundt (2020). factoextra: Extract and Visualize the Results of Multivariate Data Analyses. R package version 1.0.7. <a href="https://CRAN.R-project.org/package=factoextra">https://CRAN.R-project.org/package=factoextra</a>                |
| Factoshiny | Pauline Vaissie, Astrid Monge and Francois Husson (2021). Factoshiny: Perform Factorial Analysis from 'FactoMineR' with a Shiny Application. R package version 2.4. <a href="https://CRAN.R-project.org/package=Factoshiny">https://CRAN.R-project.org/package=Factoshiny</a> |
| reshape2   | Hadley Wickham (2007). Reshaping Data with the reshape Package. <i>Journal of Statistical Software</i> , 21(12), 1-20. URL <a href="http://www.jstatsoft.org/v21/i12/">http://www.jstatsoft.org/v21/i12/</a> .                                                                |
| rstatix    | Alboukadel Kassambara (2021). rstatix: Pipe-Friendly Framework for Basic Statistical Tests. R package version 0.7.0. <a href="https://CRAN.R-project.org/package=rstatix">https://CRAN.R-project.org/package=rstatix</a>                                                      |

---

**Table S2. Provided estimations of numbers of colonies and calculated extrapolations for 19 surveyed *Varroa* diagnosis and control methods in Europe.** For abbreviations of *Varroa* control options, see table 1.

| Cluster     | Country          | Bees      | Colonies  | Year of Estimation | Varr Monit | Ami Strip | OA_Trick I | Drone Remov | AmiF umig | OA_Sublim | BiotechMeth | FA_Short | Thy mol | Tauf luv | FA_L ong | AnotC hemPr | Flum eth | OA_MixTr | Anot Meth | Hypetherm | LacAcid | Cou mStrip | Cou mTri ck |
|-------------|------------------|-----------|-----------|--------------------|------------|-----------|------------|-------------|-----------|-----------|-------------|----------|---------|----------|----------|-------------|----------|----------|-----------|-----------|---------|------------|-------------|
| I           | England          | 29 000    | 126 000   | 2017               | 90 090     | 24 318    | 32 508     | 25 200      | 126       | 26 586    | 4 662       | 2 016    | 48 006  | 4 662    | 23 940   | 1 890       | 630      | 9 576    | 5 418     | 630       | 126     | 0          | 0           |
|             | France           | 56 773    | 1 453 605 | 2018               | 706 452    | 135 266   | 347 412    | 193 329     | 5 814     | 130 824   | 49 423      | 69 773   | 56 691  | 88 670   | 82 855   | 8 722       | 361      | 4 133    | 47 969    | 0         | 0       | 0          | 0           |
|             | Ireland          | 4 200     | 30 000    | 2018               | 20 040     | 9 180     | 2 640      | 3 150       | 30        | 10 500    | 390         | 120      | 14 460  | 30       | 2 190    | 30          | 150      | 30       | 840       | 90        | 60      | 90         | 0           |
|             | Northern Ireland | 1 400     | 2 100     | 2018               | 1 598      | 708       | 683        | 389         | 0         | 634       | 25          | 21       | 939     | 40       | 479      | 11          | 0        | 32       | 103       | 0         | 0       | 0          | 0           |
|             | Portugal         | 11 883    | 767 650   | 2018               | 419 137    | 504 346   | 132 036    | 142 015     | 7 677     | 118 986   | 38 383      | 137 409  | 235 669 | 35 312   | 5 374    | 4 606       | 282      | 12 633   | 6 141     | 14 585    | 4 606   | 22 262     | 0           |
|             | Scotland         | 2 225     | 36 000    | 2020               | 24 948     | 14 472    | 9 720      | 11 088      | 144       | 11 556    | 396         | 360      | 5 508   | 1 044    | 4 500    | 504         | 504      | 900      | 1 440     | 36        | 360     | 0          | 0           |
|             | Spain            | 32 845    | 2 868 337 | 2018               | 2 713 447  | 492 585   | 705 611    | 714 216     | 54 498    | 869 106   | 209 389     | 183 574  | 217 994 | 68 840   | 34 420   | 401 567     | 80 313   | 94 655   | 71 708    | 126 207   | 0       | 14 342     | 0           |
|             | Wales            | 1 840     | 9 000     | 2020               | 6 399      | 243       | 1 431      | 1 656       | 0         | 2 169     | 927         | 243      | 1 512   | 549      | 2 493    | 90          | 0        | 99       | 495       | 0         | 0       | 0          | 0           |
| II          | Austria          | 30 237    | 390 607   | 2019               | 336 313    | 1 562     | 139 447    | 212 881     | 3 125     | 216 787   | 145 306     | 159 758  | 21 093  | 391      | 173 039  | 781         | 1 172    | 106 245  | 6 640     | 19 921    | 11 718  | 0          | 0           |
|             | Belgium          | 8 223     | 59 835    | 2018               | 35 422     | 7 779     | 27 105     | 26 627      | 0         | 15 737    | 11 428      | 933      | 8 078   | 718      | 975      | 898         | 3 710    | 6 881    | 8 975     | 838       | 658     | 419        | 180         |
|             | Bulgaria         | 17 156    | 867 561   | 2019               | 266 341    | 79 816    | 567 385    | 141 412     | 96 299    | 97 167    | 0           | 140 545  | 52 921  | 55 524   | 37 305   | 89 359      | 58 127   | 62 464   | 116 253   | 0         | 5 205   | 29 497     | 0           |
|             | Denmark          | 6 500     | 125 000   | 2020               | 48 500     | 875       | 109 000    | 66 750      | 0         | 6 500     | 1 250       | 250      | 17 000  | 0        | 50 500   | 125         | 13 125   | 125 000  | 2 1 125   | 4 125     | 0       | 0          | 0           |
|             | Estonia          | 5 215     | 49 300    | 2019               | 29 334     | 6 064     | 31 848     | 26 326      | 3 007     | 29 925    | 11 438      | 5 029    | 6 261   | 6 409    | 8 825    | 1 233       | 3 747    | 5 916    | 1 923     | 296       | 0       | 0          | 0           |
|             | Finland          | 3 200     | 83 000    | 2019               | 66 566     | 0         | 55 39 176  | 0           | 25 896    | 166       | 644         | 5 524    | 35 0    | 29 133   | 0        | 0           | 2 241    | 83       | 0         | 0         | 0       | 0          | 0           |
|             | Germany          | 160 000   | 1 100 000 | 2020               | 644 600    | 15 400    | 682 000    | 745 800     | 0         | 161 700   | 185 900     | 408 100  | 66 000  | 1 100    | 553 300  | 0           | 17 600   | 41 800   | 0         | 9 900     | 185 900 | 0          | 0           |
|             | Greece           | 9 022     | 789 907   | 2018               | 526 078    | 134 284   | 276 467    | 106 637     | 27 647    | 60 823    | 41 075      | 3 950    | 57 663  | 0        | 5 529    | 8 689       | 43 445   | 56 083   | 52 924    | 0         | 0       | 0          | 11 849      |
|             | Italy            | 56 665    | 1 579 666 | 2019               | 273 211    | 544 985   | 664 695    | 388 598     | 0         | 630 287   | 581 317     | 169 024  | 366 483 | 94 780   | 127 953  | 17 376      | 50 549   | 132 692  | 34 753    | 695 797   | 15 0    | 0          | 0           |
|             | Latvia           | 4 300     | 103 096   | 2019               | 28 970     | 8 351     | 46 806     | 61 033      | 887       | 20 207    | 6 083       | 145      | 8 577   | 2 093    | 3 701    | 10 516      | 29 382   | 39 795   | 3 918     | 722       | 928     | 103        | 103         |
|             | Netherlands      | 10 000    | 78 000    | 2020               | 36 972     | 5 772     | 34 788     | 33 072      | 468       | 11 388    | 5 148       | 19 734   | 12 948  | 390      | 15 054   | 1 482       | 5 460    | 9 204    | 2 184     | 546       | 858     | 0          | 0           |
|             | Norway           | 4 500     | 44 000    | 2019               | 30 228     | 0         | 31 284     | 21 032      | 0         | 1 232     | 0           | 804      | 0       | 0        | 308      | 0           | 0        | 704      | 0         | 0         | 4 268   | 0          | 0           |
|             | Slovenia         | 10 933    | 204 736   | 2019               | 156 623    | 34 191    | 123 456    | 165 222     | 81 690    | 105 849   | 33 986      | 69 815   | 14 536  | 0        | 36 648   | 7 780       | 15 150   | 5 528    | 1 228     | 3 685     | 685     | 001        | 0           |
|             | Sweden           | 16 500    | 174 000   | 2019               | 119 886    | 8 526     | 109 968    | 77 952      | 0         | 27 666    | 696         | 854      | 36 540  | 7 482    | 7 482    | 174         | 348      | 8 874    | 2 958     | 522       | 4 176   | 0          | 0           |
| Switzerland | 17 500           | 165 000   | 2014      | 114 015            | 0          | 62 205    | 107 910    | 0           | 108 735   | 26 235    | 120         | 7 260    | 0       | 135 630  | 0        | 990         | 0        | 2 805    | 990       | 0         | 165     | 0          |             |
| III         | Czech Republic   | 60 330    | 686 627   | 2019               | 577 453    | 3 433     | 171 657    | 276 024     | 522 523   | 22 659    | 37 078      | 369 405  | 37 764  | 294 563  | 127 026  | 3 433       | 687      | 0        | 0         | 8 240     | 12 359  | 0          | 0           |
|             | North Macedonia  | 6 000     | 230 000   | 2020               | 89 010     | 33 580    | 128 800    | 73 600      | 81 800    | 74 750    | 17 250      | 25 070   | 39 330  | 25 070   | 8 050    | 690         | 17 480   | 0        | 11 730    | 1 380     | 0       | 31 510     | 79 120      |
|             | Poland           | 81 000    | 1 680 000 | 2019               | 370 880    | 534 240   | 525 840    | 987 840     | 207 920   | 196 560   | 470 400     | 139 440  | 119 280 | 0        | 179 760  | 307 440     | 216 720  | 0        | 322 560   | 30 240    | 0       | 0          | 0           |
|             | Romania          | 40 000    | 1 960 000 | 2019               | 726 760    | 415 520   | 337 120    | 811 440     | 293 600   | 288 120   | 607 600     | 182 160  | 164 640 | 160 160  | 135 240  | 168 800     | 156 209  | 156 800  | 194 200   | 145 040   | 103 880 | 31 360     | 31 360      |
|             | Serbia           | 10 000    | 1 250 000 | 2020               | 1 116 250  | 380 000   | 788 750    | 311 250     | 702 500   | 87 500    | 236 250     | 183 750  | 120 000 | 121 250  | 108 750  | 132 500     | 67 500   | 143 750  | 200 000   | 41 250    | 31 250  | 165 000    | 61 250      |
|             | Slovakia         | 20 050    | 336 700   | 2021               | 231 313    | 14 478    | 64 646     | 172 054     | 240 067   | 15 152    | 17 508      | 97 980   | 190 909 | 80 808   | 29 293   | 13 468      | 19 192   | 32 323   | 21 886    | 6 061     | 5 724   | 0          | 0           |
|             | Ukraine          | 254 000   | 2 540 000 | 2017               | 982 980    | 317 500   | 149 860    | 599 440     | 198 880   | 198 120   | 119 380     | 236 220  | 271 780 | 299 720  | 66 040   | 152 400     | 502 920  | 93 980   | 132 080   | 139 700   | 45 720  | 35 560     | 10 160      |
| Cluster I   | 140 166          | 5 292 692 |           | 982 111            | 181 117    | 232 040   | 1 091 043  | 68 289      | 1 170 362 | 303 594   | 393 516     | 580 777  | 199 147 | 156 251  | 417 419  | 98 241      | 342 656  | 134 114  | 141 548   | 5 152     | 36 694  | 0          |             |

|                   |     |        |     |     |     |       |     |       |       |     |     |     |     |       |     |     |     |     |     |     |     |  |
|-------------------|-----|--------|-----|-----|-----|-------|-----|-------|-------|-----|-----|-----|-----|-------|-----|-----|-----|-----|-----|-----|-----|--|
| <b>Cluster II</b> | 359 | 5 813  | 3   |     | 3   |       |     |       |       | 1   |     |     | 1   |       |     |     |     |     |     |     |     |  |
|                   | 951 | 708    | 713 | 847 | 362 | 2 220 | 215 | 1 519 | 1 050 | 109 | 704 | 169 | 196 | 138   | 242 | 482 | 236 | 62  | 237 | 56  | 12  |  |
| <b>Cluster II</b> | 471 | 8 683  | 6   | 1   | 2   |       | 5   |       |       | 1   |     | 1   |     |       |     |     |     |     |     |     |     |  |
|                   | 380 | 327    | 094 | 698 | 146 | 3 231 | 247 | 882   | 1 505 | 234 | 943 | 646 | 654 | 778   | 981 | 479 | 882 | 371 | 198 | 263 | 181 |  |
| <b>Total</b>      | 971 | 19 789 | 13  | 6   | 6   | 6 543 | 530 | 3 573 | 2 859 | 737 | 229 | 015 | 006 | 1 334 | 322 | 304 | 253 | 575 | 441 | 356 | 194 |  |
|                   | 497 | 727    | 816 | 472 | 942 | 119   | 552 | 119   | 088   | 365 | 365 | 604 | 792 | 322   | 344 | 982 | 054 | 698 | 404 | 309 | 021 |  |

**Table S3. Respondents per European country who applied 0\*, 1 or multiple different *Varroa* control options during April 2019 and March 2020;**  
 0\* stands for "no answer" or "no treatment"; responses for *Varroa* monitoring excluded from calculations.

| Country          | Respondents | 0*             | 1            | 2              | 3              | 4              | 5           | 6          | ≥7        |
|------------------|-------------|----------------|--------------|----------------|----------------|----------------|-------------|------------|-----------|
| Austria          | 1 453       | 20 (1.4 %)     | 82 (5.6 %)   | 394 (27.1 %)   | 521 (35.9 %)   | 313 (21.5 %)   | 109 (7.5 %) | 14 (1.0 %) | 0 (0.0 %) |
| Belgium          | 564         | 72 (12.8 %)    | 111 (19.7 %) | 159 (28.2 %)   | 138 (24.5 %)   | 71 (12.6 %)    | 9 (1.6 %)   | 3 (0.5 %)  | 1 (0.2 %) |
| Bulgaria         | 51          | 4 (7.8 %)      | 15 (29.4 %)  | 23 (45.1 %)    | 7 (13.7 %)     | 0 (0.0 %)      | 1 (2.0 %)   | 1 (2.0 %)  | 0 (0.0 %) |
| Czech Republic   | 1 729       | 88 (5.1 %)     | 169 (9.8 %)  | 588 (34.0 %)   | 537 (31.1 %)   | 253 (14.6 %)   | 79 (4.6 %)  | 11 (0.6 %) | 4 (0.2 %) |
| Denmark          | 1 087       | 18 (1.7 %)     | 80 (7.4 %)   | 308 (28.3 %)   | 617 (56.8 %)   | 54 (5.0 %)     | 10 (0.9 %)  | 0 (0.0 %)  | 0 (0.0 %) |
| England          | 1 262       | 233 (18.5 %)   | 461 (36.5 %) | 402 (31.9 %)   | 133 (10.5 %)   | 25 (2.0 %)     | 5 (0.4 %)   | 3 (0.2 %)  | 0 (0.0 %) |
| Estonia          | 178         | 5 (2.8 %)      | 32 (18.0 %)  | 44 (24.7 %)    | 49 (27.5 %)    | 34 (19.1 %)    | 10 (5.6 %)  | 4 (2.2 %)  | 0 (0.0 %) |
| Finland          | 215         | 22 (10.2 %)    | 10 (4.7 %)   | 60 (27.9 %)    | 110 (51.2 %)   | 12 (5.6 %)     | 1 (0.5 %)   | 0 (0.0 %)  | 0 (0.0 %) |
| France           | 1 030       | 140 (13.6 %)   | 643 (62.4 %) | 188 (18.3 %)   | 46 (4.5 %)     | 10 (1.0 %)     | 2 (0.2 %)   | 0 (0.0 %)  | 1 (0.1 %) |
| Germany          | 10 610      | 1 091 (10.3 %) | 669 (6.3 %)  | 2 234 (21.1 %) | 4 129 (38.9 %) | 1 915 (18.0 %) | 498 (4.7 %) | 73 (0.7 %) | 1 (0.0 %) |
| Greece           | 170         | 47 (27.6 %)    | 74 (43.5 %)  | 39 (22.9 %)    | 9 (5.3 %)      | 0 (0.0 %)      | 1 (0.6 %)   | 0 (0.0 %)  | 0 (0.0 %) |
| Ireland          | 375         | 79 (21.1 %)    | 165 (44.0 %) | 108 (28.8 %)   | 18 (4.8 %)     | 5 (1.3 %)      | 0 (0.0 %)   | 0 (0.0 %)  | 0 (0.0 %) |
| Italy            | 364         | 35 (9.6 %)     | 41 (11.3 %)  | 125 (34.3 %)   | 80 (22.0 %)    | 62 (17.0 %)    | 12 (3.3 %)  | 6 (1.6 %)  | 3 (0.8 %) |
| Latvia           | 364         | 26 (7.1 %)     | 91 (25.0 %)  | 122 (33.5 %)   | 87 (23.9 %)    | 31 (8.5 %)     | 2 (0.5 %)   | 4 (1.1 %)  | 1 (0.3 %) |
| Netherlands      | 1 857       | 420 (22.6 %)   | 305 (16.4 %) | 534 (28.8 %)   | 465 (25.0 %)   | 113 (6.1 %)    | 17 (0.9 %)  | 3 (0.2 %)  | 0 (0.0 %) |
| North Macedonia  | 217         | 11 (5.1 %)     | 27 (12.4 %)  | 68 (31.3 %)    | 50 (23.0 %)    | 47 (21.7 %)    | 13 (6.0 %)  | 1 (0.5 %)  | 0 (0.0 %) |
| Northern Ireland | 117         | 11 (9.4 %)     | 34 (29.1 %)  | 48 (41.0 %)    | 20 (17.1 %)    | 2 (1.7 %)      | 2 (1.7 %)   | 0 (0.0 %)  | 0 (0.0 %) |
| Norway           | 765         | 175 (22.9 %)   | 241 (31.5 %) | 274 (35.8 %)   | 68 (8.9 %)     | 6 (0.8 %)      | 0 (0.0 %)   | 1 (0.1 %)  | 0 (0.0 %) |
| Poland           | 426         | 7 (1.6 %)      | 40 (9.4 %)   | 136 (31.9 %)   | 126 (29.6 %)   | 80 (18.8 %)    | 25 (5.9 %)  | 6 (1.4 %)  | 6 (1.4 %) |
| Portugal         | 125         | 23 (18.4 %)    | 48 (38.4 %)  | 27 (21.6 %)    | 17 (13.6 %)    | 5 (4.0 %)      | 3 (2.4 %)   | 1 (0.8 %)  | 1 (0.8 %) |
| Romania          | 121         | 5 (4.1 %)      | 25 (20.7 %)  | 31 (25.6 %)    | 27 (22.3 %)    | 15 (12.4 %)    | 10 (8.3 %)  | 2 (1.7 %)  | 6 (5.0 %) |
| Scotland         | 292         | 36 (12.3 %)    | 93 (31.8 %)  | 116 (39.7 %)   | 39 (13.4 %)    | 6 (2.1 %)      | 1 (0.3 %)   | 1 (0.3 %)  | 0 (0.0 %) |
| Serbia           | 125         | 0 (0.0 %)      | 9 (7.2 %)    | 45 (36.0 %)    | 43 (34.4 %)    | 14 (11.2 %)    | 7 (5.6 %)   | 4 (3.2 %)  | 3 (2.4 %) |
| Slovakia         | 548         | 49 (8.9 %)     | 48 (8.8 %)   | 118 (21.5 %)   | 158 (28.8 %)   | 112 (20.4 %)   | 49 (8.9 %)  | 10 (1.8 %) | 4 (0.7 %) |
| Slovenia         | 105         | 4 (3.8 %)      | 0 (0.0 %)    | 19 (18.1 %)    | 35 (33.3 %)    | 35 (33.3 %)    | 8 (7.6 %)   | 4 (3.8 %)  | 0 (0.0 %) |
| Spain            | 156         | 4 (2.6 %)      | 57 (36.5 %)  | 56 (35.9 %)    | 30 (19.2 %)    | 6 (3.8 %)      | 2 (1.3 %)   | 1 (0.6 %)  | 0 (0.0 %) |
| Sweden           | 1 646       | 131 (8.0 %)    | 411 (25.0 %) | 704 (42.8 %)   | 347 (21.1 %)   | 45 (2.7 %)     | 7 (0.4 %)   | 1 (0.1 %)  | 0 (0.0 %) |

---

|                    |       |             |              |              |              |              |            |           |           |
|--------------------|-------|-------------|--------------|--------------|--------------|--------------|------------|-----------|-----------|
| <b>Switzerland</b> | 1 665 | 5 (0.3 %)   | 65 (3.9 %)   | 466 (28.0 %) | 925 (55.6 %) | 167 (10.0 %) | 34 (2.0 %) | 3 (0.2 %) | 0 (0.0 %) |
| <b>Ukraine</b>     | 702   | 66 (9.4 %)  | 272 (38.7 %) | 198 (28.2 %) | 105 (15.0 %) | 35 (5.0 %)   | 15 (2.1 %) | 4 (0.6 %) | 7 (1.0 %) |
| <b>Wales</b>       | 90    | 27 (30.0 %) | 35 (38.9 %)  | 19 (21.1 %)  | 6 (6.7 %)    | 3 (3.3 %)    | 0 (0.0 %)  | 0 (0.0 %) | 0 (0.0 %) |

---

**Table S4. Number of respondents and total coumaphos usage (either trickling or in strips) in Northern Macedonia in the years 2014/15 to 2020/21.**

| Season    | No. of responses | Percentage of beekeepers applying coumaphos |
|-----------|------------------|---------------------------------------------|
| 2014/2015 | 190              | 0.00                                        |
| 2015/2016 | 296              | 2.70                                        |
| 2016/2017 | 320              | 1.56                                        |
| 2017/2018 | 171              | 1.75                                        |
| 2018/2019 | 115              | 2.61                                        |
| 2019/2020 | 217              | 30.73                                       |
| 2020/2021 | 151              | 4.64                                        |

Could you please indicate the months when you monitored your production colonies for Varroa AND also indicate when you STARTED a Varroa treatment or management plan during the period April 2018 - April 2019?

|                                                                                              | Apr 19                   | May 19                   | June 19                  | July 19                  | Aug 19                   | Sep 19                   | Oct 19                   | Nov 19                   | Dec 19                   | Jan 20                   | Feb 20                   | Mar 20                   |
|----------------------------------------------------------------------------------------------|--------------------------|--------------------------|--------------------------|--------------------------|--------------------------|--------------------------|--------------------------|--------------------------|--------------------------|--------------------------|--------------------------|--------------------------|
| Monitoring of Varroa infestation level (e.g. counting mite fall)                             | <input type="checkbox"/> |
| Drone brood removal                                                                          | <input type="checkbox"/> |
| Hyperthermia (heat treatment of brood/bees)                                                  | <input type="checkbox"/> |
| Other biotechnical method (as e.g. trapping comb, complete brood removal, queen confinement) | <input type="checkbox"/> |
| Formic acid - short term                                                                     | <input type="checkbox"/> |
| Formic acid - long term (e.g. MAQS)                                                          | <input type="checkbox"/> |
| Lactic acid                                                                                  | <input type="checkbox"/> |
| Oxalic acid - trickling                                                                      | <input type="checkbox"/> |
| Oxalic acid - sublimation (evaporation)                                                      | <input type="checkbox"/> |
| Oxalic acid mixtures (e.g. Hiveclean/Bienenwohl/Varromed)                                    | <input type="checkbox"/> |
| Thymol (e.g. Apiguard, ApilifeVar)                                                           | <input type="checkbox"/> |
| Tau-fluvalinate (e.g. Apistan)                                                               | <input type="checkbox"/> |
| Flumethrin (e.g. Bayvarol, Polyvar)                                                          | <input type="checkbox"/> |
| Amitraz (in strips, e.g. Apivar, Apitraz)                                                    | <input type="checkbox"/> |
| Amitraz (Verdampfen)                                                                         | <input type="checkbox"/> |
| Coumaphos (e.g. Perizin)                                                                     | <input type="checkbox"/> |
| Coumaphos (in strips, e.g. Checkmite+)                                                       | <input type="checkbox"/> |
| Another chemical product                                                                     | <input type="checkbox"/> |
| Another method                                                                               | <input type="checkbox"/> |

Ⓜ If you have used the same method over several months, state only the first month.

**Figure S1. Varroa matrix question used in the study.**



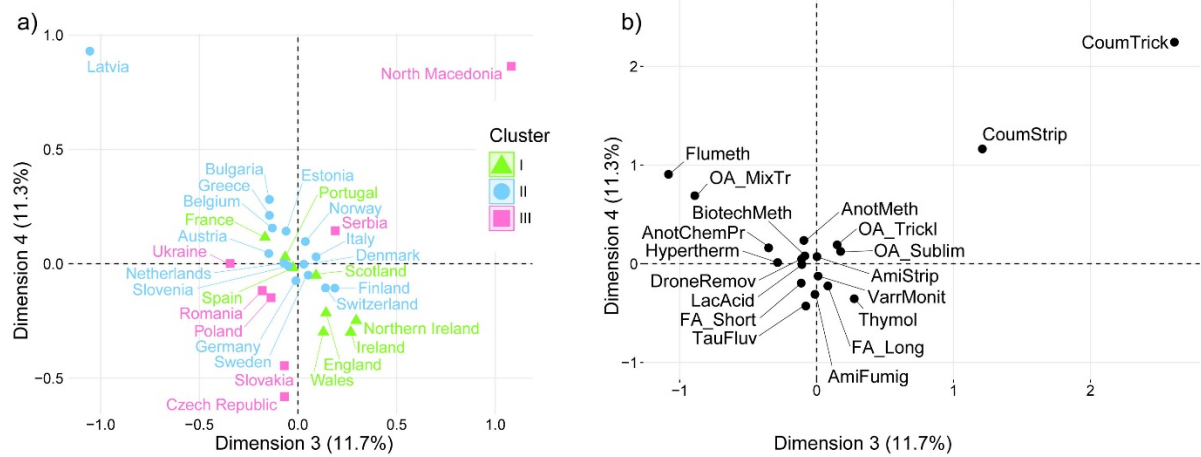

**Figure S2. Third and fourth dimension of correspondence analysis of *Varroa* diagnosis and control methods in Europe based on respondent data.** a) Factor map of 30 countries and the three clusters they form. b) All 19 factors (*Varroa* control methods). For abbreviations of *Varroa* control options, see table 1.

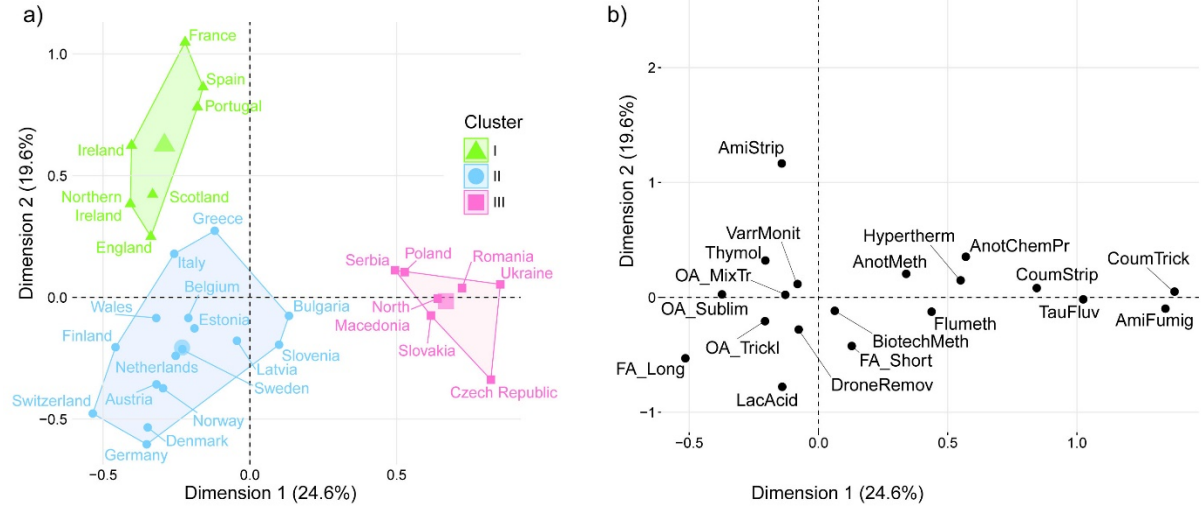

**Figure S3. Correspondence analysis of *Varroa* diagnosis and control methods in Europe based on colony data.** a) Factor map of 30 countries and the three clusters they form. b) All 19 factors. For abbreviations of *Varroa* control options, see table 1.

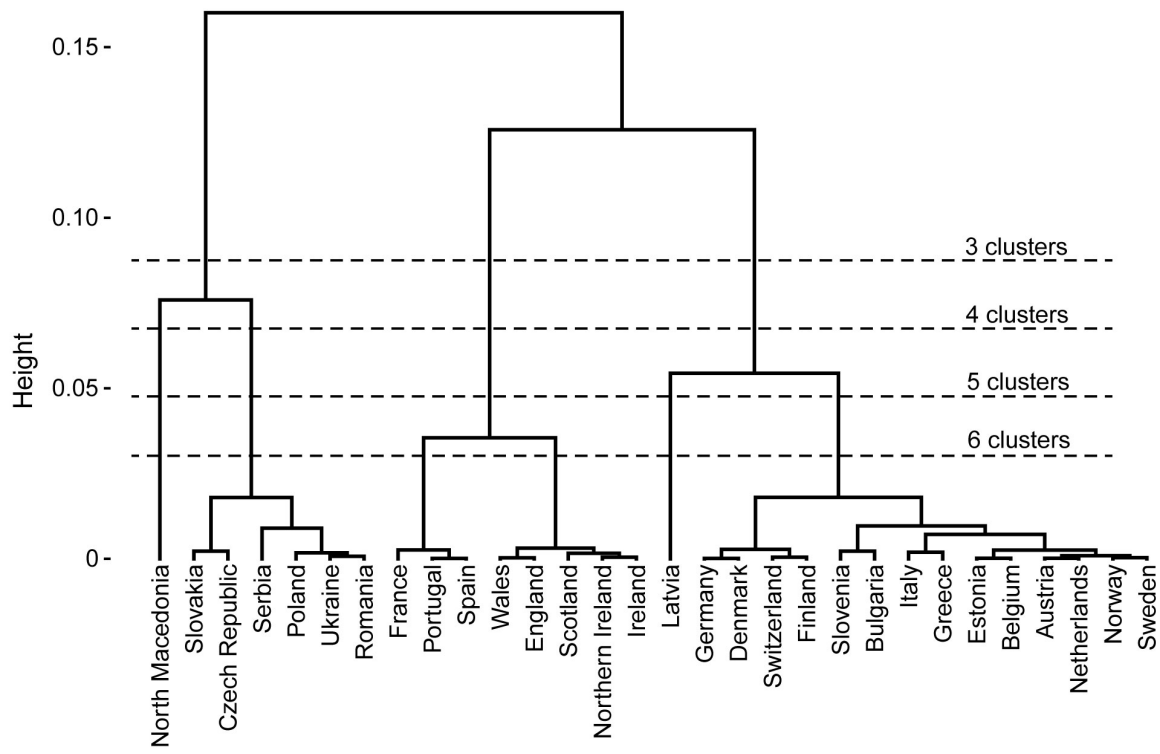

**Figure S4. Dendrogram of agglomerative hierarchical clustering conducted on components of correspondence analysis.** Dashed lines mark different numbers of clusters and their compositions.

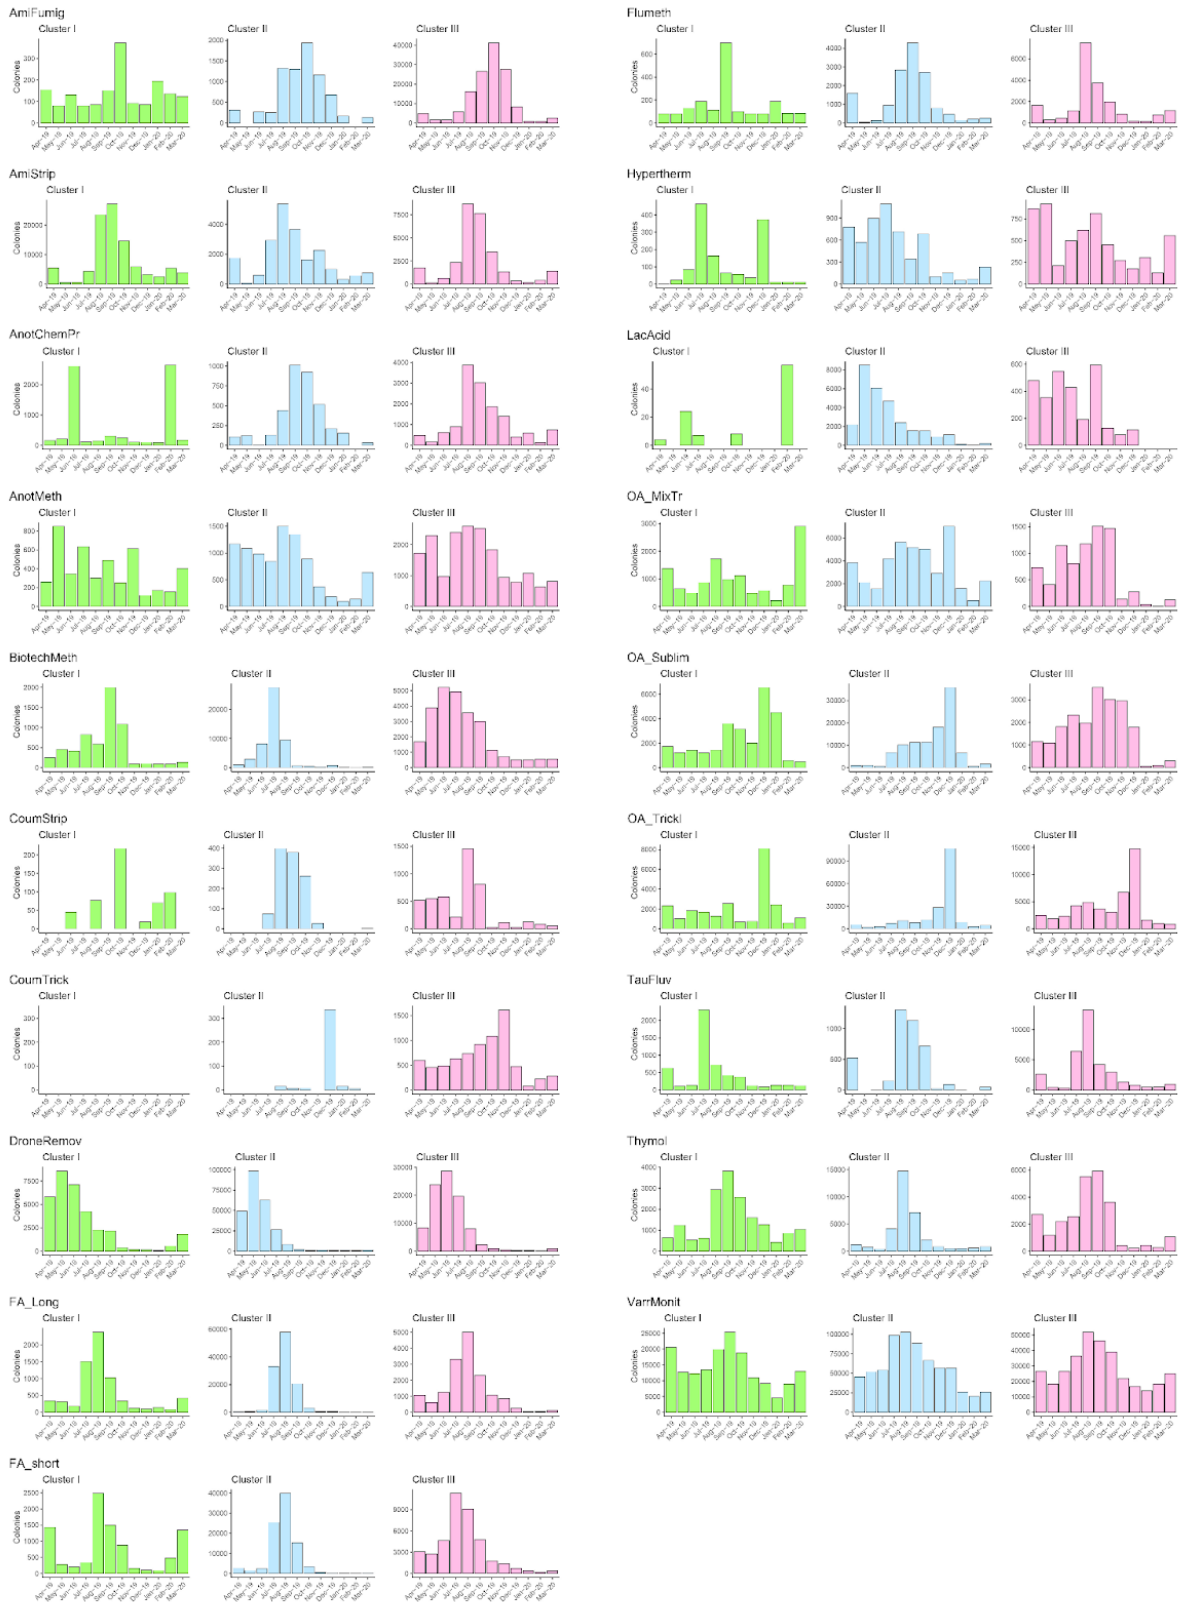

**Figure S5. Temporal dynamics of application of *Varroa* diagnosis and control methods.** Count of colonies treated with respective control options in a certain month for the three different clusters are shown. For abbreviations of *Varroa* control options, see table 1.

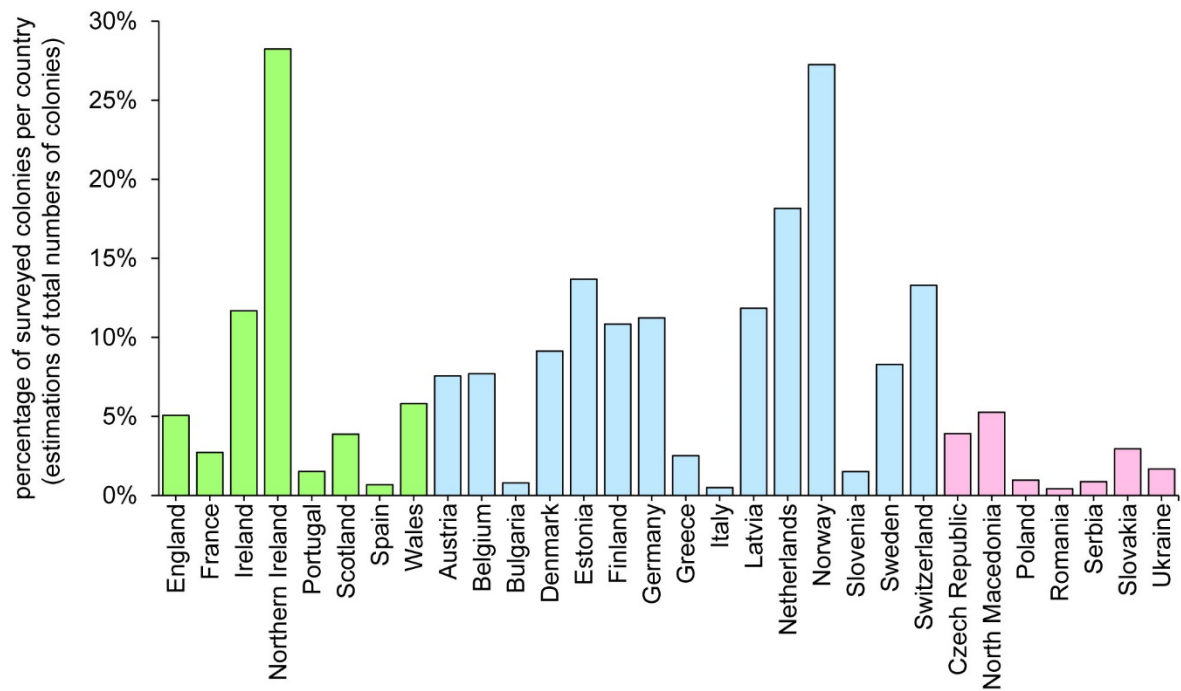

**Figure S6. Proportion of surveyed colonies.** The percentage of surveyed colonies in a participating country is shown. The calculations are based on estimations of existing numbers of colonies provided by national coordinators.
